## 1 **Modular transcriptional responses to environmental changes**

2 Marc Beringer<sup>1,2</sup>, Bella Mattam<sup>1,2</sup>, Rimjhim Roy Choudhury<sup>1,2</sup> & Christian Parisod<sup>1,2</sup>

3 <sup>1</sup>Department of Biology, University of Fribourg, Fribourg, Switzerland

4 <sup>2</sup>Institute of Plant Sciences, University of Bern, Bern, Switzerland

5

6 Authors for correspondence: Christian Parisod, [christian.parisod@unifr.ch](mailto:christian.parisod@unifr.ch)

7

8 **Summary:** Knowledge about the molecular underpinnings of phenotypic plasticity is still scarce and  
9 quantifying gene expression in response to abiotic and biotic factors enables to investigate  
10 transcriptional plasticity. RNAseq data on clones of the alpine plant *Biscutella laevigata*  
11 (Brassicaceae) subjected to control, cold, heat, drought and herbivory treatments assessed  
12 differentially expressed genes (DEGs) and transposable elements (DE-TEs) in comparison to similar  
13 experiments in *Arabidopsis thaliana*. Synergistic and trade-off DEGs presenting parallel and  
14 antagonistic regulation among treatments were further identified and used with networks of co-  
15 expressed DEGs to characterize transcriptional plasticity in response to environmental changes.  
16 Compared to *A. thaliana*, *B. laevigata* presented fewer DEGs that were mostly up-regulated by  
17 stronger expression shifts in response to environmental treatments. *Biscutella laevigata* showed  
18 constitutive expression of half of the *A. thaliana* DEGs. It further presented a higher proportion of  
19 synergistic DEGs, a lower number of trade-off DEGs and a transcriptome organized in environment-  
20 specific subnetworks. Several DE-TEs were identified as activated by heat and herbivory. The stress-  
21 tolerant perennial *B. laevigata* presents a highly modular transcriptional plasticity in response to  
22 environmental changes, contrasting with the more integrated transcriptome of *A. thaliana*.

23

24 **Keywords:** Abiotic and biotic stresses, Brassicaceae, gene expression trade-off, RNAseq, synergistic  
25 gene expression, transcriptional plasticity, transposable elements, weighted gene co-expression  
26 network analysis

27

28 **Significance statement:** Little is known about the molecular underpinnings of phenotypic plasticity.  
29 Here, focusing on expression shifts during changes in abiotic and biotic conditions, we highlight  
30 environment-responsive genes acting synergistically or antagonistically among treatments and  
31 underlying modular transcriptional plasticity in two Brassicacea species.

32

### 33 **Introduction**

34 To survive and reproduce in changing environments, plants sense changes in abiotic and biotic factors,  
35 such as temperature, water availability and herbivores that trigger cascades of transcriptional changes  
36 leading to appropriate physiological responses (Kollist *et al.*, 2019; Zhang *et al.*, 2022). When the  
37 environmental stimulus impairs optimal growth and development, the stimulus becomes a stressor  
38 (Fujita *et al.*, 2009). Despite numerous studies of gene expression under stress, our current  
39 understanding of transcriptional changes in response to environmental conditions represents mostly  
40 a post-hoc integration of genes characterized as triggered by a single factor (VanWalleendael *et al.*,  
41 2019). The architecture of transcriptional responses to multiple environmental changes and thus the  
42 mechanisms of transcriptional plasticity remain elusive.

43 The transcriptome is anticipated to have evolved as a robust system, able to maintain functional  
44 interactions among gene products and integrity of the entire system against perturbations triggered  
45 by unpredictable environmental changes (Csete & Doyle, 2004; Kitano, 2004). Transcriptional plasticity  
46 in response to specific environmental triggers is likely key to maintain plant growth and reproduction,  
47 although it remains largely unknown to what extent environment-responsive genes act in synergy or  
48 are constrained by antagonistic interactions consistent with trade-offs (Stearns & Magwene, 2003;  
49 Lundgren & des Marais, 2020). It is thus necessary to assess patterns underlying transcriptional  
50 plasticity in response to independent environmental changes and identify possible functional modules  
51 of environment-responsive genes being regulated synergistically, or antagonistically (i.e. expression  
52 trade-offs).

53 Sensing of sub-optimal environments first induces a general stress response, leading to a more specific  
54 response (Zhang *et al.*, 2022). The general response involves abscisic acid (ABA) and the expression of  
55 genes with ABA-responsive *cis*-elements (ABRE) as well as *dehydration-response element binding*  
56 (*DREB*)-type proteins (Nakashima *et al.*, 2009) that act in synergy to regulate osmolyte levels and  
57 stomatal aperture, and to detoxify accumulating reactive oxygen species (Claeys & Inzé, 2013). Genes  
58 downstream of corresponding regulation cascades are expectedly constrained by expression trade-  
59 offs to trigger environment-specific responses (Kollist *et al.*, 2019). Nevertheless, the transcriptional  
60 basis of physiological trade-offs such as the opening of stomata that mitigates heat stress and increases  
61 the risk of drought stress (Jacob *et al.*, 2017), or defense against herbivores mediated by jasmonic acid  
62 (Howe & Jander, 2008) that also impedes growth (Devoto & Turner, 2005), deserves attention.

63 High-throughput sequencing of transcriptomes (RNAseq) is a powerful approach to assess expression  
64 and, in the absence of ample genomic resources (e.g. in non-model species), can be performed based  
65 on *de novo* transcriptome assemblies out of RNAseq reads themselves (Wang & Gribskov, 2017).  
66 Accordingly, the emergence of standardized practices for generating and analysing RNAseq data

67 (Conesa *et al.*, 2016) offers support towards meaningful conclusions on transcriptional plasticity under  
68 environmental changes. Here, we address transcriptional responses of *Biscutella laevigata*, a  
69 widespread species belonging to an early diverging Brassicaceae genus (Couvreur *et al.*, 2010; Hendriks  
70 *et al.*, 2022) to different environments. Being a textbook example of autopolyploidy linked to ice ages  
71 (Manton, 1937; Parisod & Besnard, 2007), diploids of *B. laevigata* occur across major ecological  
72 gradients (e.g. elevation from sea level to >2'000 m; Tremetsberger *et al.*, 2002), or in extreme  
73 environments such as serpentine (Bürki *et al.*, 2023) and mine soils (Babst-Kostecka *et al.*, 2016). To  
74 investigate transcriptional plasticity, RNAseq on clones of a diploid *B. laevigata* subjected to cold, heat,  
75 drought and herbivory treatments, simulating abiotic and biotic stressors common to alpine  
76 environments, were compared with similar data from *Arabidopsis thaliana* (Klepikova *et al.*, 2016;  
77 Dubois *et al.*, 2017; Nallu *et al.*, 2018). This study thus aims at (i) evaluating approaches based on *de*  
78 *novo* transcriptome and genome assembly references to quantify gene expression, (ii) characterizing  
79 the transcriptional response of a non-model species in light of functional insights from a model plant  
80 to identify environment-responsive genes, and (iii) assessing patterns of plant transcriptional plasticity  
81 in response to environmental changes.

82

### 83 **Materials and Methods**

#### 84 *Plant material and environmental treatments*

85 One diploid individual of *Biscutella laevigata* subsp. *austriaca* (Brassicaceae) was grown for a year,  
86 from seeds collected in the alpine population of Schneealpe (Steiermark, Austria; 1740 m above sea  
87 level; GPS: 47.6968°N, 15.6100°E), under standardized greenhouse conditions (16 h / 8 h light / dark,  
88 22-26°C / 16-18°C, 65% relative air humidity, 20-40 kLux). Cuttings of that individual, including root  
89 and several leaves, were regenerated for ten weeks, forming ramets (i.e. clones) with at least eight  
90 new leaves.

91 To investigate transcriptional responses of *B. laevigata* to environmental treatments, individual clones  
92 were subjected to cold, heat, drought and herbivory conditions mimicking existing studies in *A.*  
93 *thaliana* (Klepikova *et al.*, 2016; Dubois *et al.*, 2017; Nallu *et al.*, 2018). After an acclimation phase of  
94 seven days in a growth chamber under control conditions, the treatment phase started by stopping  
95 the watering of drought-treated clones until they showed first wilting leaves. At that moment the  
96 herbivory treatment (lasting 30 h) was started around noon, whereas the 24 h cold treatment was  
97 initiated at 6 pm and the heat treatment (9 h in total) was started at 9 am the next day. Accordingly,  
98 all treatments were terminated on the same day at 6 pm and treated leaves were harvested and snap  
99 frozen in liquid nitrogen. Subsequently relocated back to control conditions, all clones survived.

100 *Control treatment*: all clones were relocated to a growth chamber with cycles of 16 h of light (100-120  
101  $\mu\text{M}$  photosynthetically active radiation) and 8 h of dark at 22°C, under 45% relative air humidity and  
102 daily watering. Four clones were left under control conditions. Control conditions were similar for *A.*  
103 *thaliana*.

104 *Cold treatment*: four clones were relocated to a 4°C-room for 24 h under the same light cycle as in the  
105 control conditions, although with slightly lower light intensity (70-90  $\mu\text{M}$ ). *Arabidopsis thaliana* was  
106 treated the same (Klepikova *et al.*, 2016).

107 *Drought treatment*: watering of three clones in the same growth chamber as the control treatment  
108 was stopped for a total of 11.5 days. Leaves were harvested 1.5 days after first evidence of wilting. In  
109 *A. thaliana*, watering was omitted for 3 days (Dubois *et al.*, 2017).

110 *Heat treatment*: three clones were relocated to a growth chamber with the same settings as the  
111 control conditions. Temperature was raised gradually to 42°C during 3 h, where it remained for  
112 additional 6 h. A gradual increase in temperature has been shown to promote higher-fold  
113 transcriptome changes compared to sudden heat shocks (Larkindale & Vierling, 2008). Contrastingly,  
114 *A. thaliana* was subjected directly to 42°C for 6 h (Klepikova *et al.*, 2016).

115 *Herbivory treatment*: three clones in the same growth chamber as control conditions were each  
116 applied eight larvae of the generalist herbivore Diamondback Moth (*Plutella xylostella*; 3<sup>rd</sup> to 5<sup>th</sup> instar;  
117 6-9 mm in length, Ehling *et al.*, 2008) for 30 h. The mature leaf under treatment was encapsulated  
118 with a small plastic cage, wherein larvae were held (SI figure 2), resulting in between 10% and 20% of  
119 feeding damage by the time of harvest. In *A. thaliana*, 48 h old larvae of the Brassicacea specialist  
120 herbivore *Pieris rapae* were applied for 24 h (Nallu *et al.*, 2018).

## 121 122 *RNA extraction and sequencing*

123 Total RNA was extracted from 50-100mg of snap frozen leaf tissue of each experimental clone, using  
124 the RNeasy mini kit (Qiagen) following a DNase I treatment (Thermo Fisher Scientific). Samples were  
125 assessed using the Bioanalyzer 2100 system (Agilent) and considered for library preparation when the  
126 ribosomal RNA integrity number was over 7.0 (SI table 1).

127 In *B. laevigata* 17 RNAseq libraries (i.e. four biological replicates for the control and for the cold  
128 treatments, and three for the drought, heat and herbivory treatments) were processed at the next-  
129 generation sequencing platform of the University of Bern (Switzerland). Library preparation included  
130 the "TruSeq Stranded Total RNA with Ribo-Zero Plant"-kit (Illumina), ribosomal RNA depletion and size  
131 selection of 300 bp fragments. Sequencing on two lanes of an S2 flow cell of the NovaSeq6000 system  
132 yielded 50 bp paired-end (PE) reads (SI table 1). In *A. thaliana* 19 RNAseq libraries, sequenced as 50 bp

133 single-end reads, were downloaded (SI table 2): two libraries each for cold, heat and their control  
134 treatments (Klepikova *et al.*, 2016), two libraries for the drought treatment and three libraries for its  
135 control treatment (Dubois *et al.*, 2017) and three libraries each for the herbivory and its control  
136 treatment (Nallu *et al.*, 2018).

137 Adapter-trimmed raw PE-reads were quality controlled using FASTQC (Andrews, 2010) and  
138 summarized with MULTIQC (Ewels *et al.*, 2016). To correct for sequencing errors, erroneous k-mers  
139 were identified and removed using the script *FilterUncorrectablePEfastq* in rCorrector (Song & Florea,  
140 2015). An *in silico* rRNA-depletion was performed by mapping remaining reads to ribosomal RNA  
141 sequences from all organisms using bowtie2 (Langmead & Salzberg, 2012).

142

### 143 *De novo transcriptome assembly, annotation and quality control*

144 To support a *de novo* transcriptome assembly, we further generated RNAseq libraries from seven  
145 tissues (leaf, senescent leaf, root, stem, closed flower bud, open flower and meristem) of a *B. laevigata*  
146 clone under control conditions (SI Figure 1b). Library preparation included the "TruSeq Stranded Total  
147 RNA Library Prep Human/Mouse/Rat"-kit (Illumina), ribosomal RNA depletion and a size selection step  
148 for 300 bp fragments. Sequencing on one lane of the HiSeq3000 system, yielded 150 bp PE reads (SI  
149 table 1).

150 Processed reads from these seven tissues and the reads of the largest libraries in each of the five  
151 treatments (SI table 1) were used as input for the *B. laevigata de novo* transcriptome. Assembly was  
152 conducted with TRINITY (Grabherr *et al.*, 2011; Haas *et al.*, 2013), with default parameters and the  
153 strandedness parameter set to -SS\_lib\_type FR. The *de novo* transcriptome was annotated with the  
154 Trinotate pipeline (Bryant *et al.*, 2017) that identifies and aligns protein-coding sequences (CDS) to the  
155 swissprot protein database (561'568 protein sequences; [www.uniprot.org](http://www.uniprot.org); accessed in January 2020)  
156 using BLASTX with an e-value cut-off of  $1e^{-5}$ . The *de novo* assembled transcripts were further linked  
157 with gene annotations from the genome assembly of *B. laevigata* and *A. thaliana* through a BLASTN  
158 with an e-value cut-off of  $1e^{-10}$ .

159 The *de novo* transcriptome assembly was quality-controlled by assessing the proportion of input reads  
160 used in the final assembly, as well as the mapping of the twelve input RNAseq libraries to the  
161 transcriptome using bowtie2, allowing for up to 20 valid alignments per read. We measured the N50  
162 value and gauged completeness of the *de novo* transcriptome of *B. laevigata* by conducting BLASTX  
163 with the *A. thaliana* protein database (27'465 protein sequences; UniProt accession number  
164 UP000006548), using an e-value cut-off of  $1e^{-20}$  and only returning the first hit. We computed the

165 BUSCO-score (Benchmarking Universal Single-Copy Orthologs, v4.1.4; Manni *et al.*, 2021), using the  
166 "eudicotyledons\_odb10" database (Creation date: 2019-11-20, with 2326 BUSCOs).

167

#### 168 *Gene expression quantification and differential gene expression analysis*

169 Gene expression among the 17 libraries encompassing environmental treatments in *B. laevigata* was  
170 quantified based on the *de novo* transcriptome CDS, as well as the CDS of the *B. laevigata* genome  
171 assembly (comprising of 54'457 genes and 88'133 isoforms; table 1), enabling comparisons of  
172 transcriptome-based and genome-based quantification as well as direct comparisons with genome-  
173 based analyses in *A. thaliana* (Araport11\_genes.201606.cds.fasta.gz; Cheng *et al.*, 2017).

174 Gene expression was quantified using RSEM estimated counts (Li & Dewey, 2011) that served as input  
175 for differential gene expression analyses using edgeR (Robinson *et al.*, 2009). Following a within-  
176 sample normalization, gene expression was evaluated as transcript per million (TPM) to ensure  
177 independence from transcript length and increase comparability among samples (Li *et al.*, 2009;  
178 Wagner *et al.*, 2012). To further account for RNAseq library sizes, cross-sample normalization of TPM  
179 expression was performed with the "trimmed mean of M values" (TMM) method (Robinson & Oshlack,  
180 2010). Differential gene expression analyses were conducted on RSEM estimated counts using the  
181 TRINITY script *run\_DE\_analysis.pl* to estimate log<sub>2</sub>-fold-change (logFC) and *analyse\_diff\_expr.pl* to  
182 extract ≥2-fold differentially expressed genes (DEGs) at a Benjamini-Hochberg false discovery rate  
183 (FDR) <0.001 (Benjamini & Hochberg, 1995).

184

#### 185 *Gene functional enrichment analysis*

186 To what extent sets of genes (e.g. treatment-specific DEGs) were enriched in particular functional  
187 categories was assessed through gene ontology (GO) enrichment analyses, using the topGO R-package  
188 (Alexa *et al.*, 2006). We used GO-term annotation files from the Trinotate-pipeline for the *de novo*  
189 transcriptome and genome assembly of *B. laevigata* and the latest Araport11 annotation of Berardini  
190 *et al.* (2004) for *A. thaliana* (<https://www.arabidopsis.org>; downloaded in November 2021). Although  
191 overrepresented GO-terms should be interpreted with caution, functional insights gathered here for  
192 *B. laevigata* appear particularly credible, given relatedness with the model plant *A. thaliana* that  
193 benefits from ample experimental support (Primmer *et al.*, 2013).

194

#### 195 *Weighted gene co-expression network analysis*

196 Genome-based expression data were analysed through weighted gene co-expression networks, using  
197 the WGCNA R-package (Langfelder & Horvath, 2008), to assess the transcriptome architecture. Nodes

198 (genes) were connected through edges, weighted between 0 and 1 based on the correlation of gene  
199 expression profiles (i.e. “adjacency”) using TMM-normalized gene expression values from  
200 environmental treatments. Genes showing similar expression profiles across samples were grouped  
201 into modules that were correlated to environmental treatments.

202 Independent co-expression networks were generated for *B. laevigata* and *A. thaliana* following the  
203 pipeline available at <https://github.com/Persilian/WGCNA/wiki>. Briefly, using TMM-normalized  
204 expression matrices with an optimal soft-threshold power set to 11 and fitting the scale-free topology  
205 criterion as  $r^2 = 0.95$  for the *Biscutella* data and  $r^2 = 0.89$  for the *A. thaliana* data, networks were  
206 computed with the function “blockwiseModules()” using corType = “pearson”, networkType =  
207 “unsigned”, maxBlockSize = 10000, TOMType = “unsigned”, minModuleSize = 30 and mergeCutHeight  
208 = 0.1. Only DEGs were visualized into subnetworks using *Cytoscape* (Shannon *et al.*, 2003) by subsetting  
209 the adjacency matrices containing pairwise edge-weights among all genes. The “Perforce Force Directed  
210 Layout” was applied (1000 iterations, spring coefficient = 0.5, spring length = 20, node mass = 1000  
211 and “Force deterministic layouts”) and only edges above a threshold (adj\_threshold = 0.5 for *B.*  
212 *laevigata* and 0.7 for *A. thaliana*) were visualized. A higher edge-weight threshold was selected for *A.*  
213 *thaliana* because a threshold  $\geq 0.5$  included over 200’000 edges and precluded subsequent analyses.

214

#### 215 *Quantification of transposable element expression*

216 The expression of 8’646 full-length sequences of transposable elements (TEs) annotated in the *B.*  
217 *laevigata* genome was quantified using the SalmonTE pipeline (Jeong *et al.*, 2018). Briefly, a fasta file  
218 containing internal coding sequences of TEs extracted using BEDtools-getfasta (Quinlan & Hall, 2010)  
219 was used for rapid quasi-mapping of RNAseq reads from the 17 libraries of environmental treatments,  
220 resulting in TE expression in TPM. Differential expression among environmental treatments was tested  
221 using a Generalized Linear Model, for each TE copy as well as their aggregation into TE clades.

222 To distinguish differentially expressed TEs (DE-TE) whose expression is potentially controlled directly  
223 by an environmental treatment from DE-TEs showing co-expression with adjacent genes responding  
224 to the treatment, reverse-transcriptase sequences from all TEs were extracted using TESorter, aligned  
225 using MAFFT (Kato *et al.*, 2002) and clustered using maximum-likelihood phylogenetic trees in iTOL  
226 (Letunic & Bork, 2021). Monophyletic clades of DE-TE copies being consistently up-regulated in  
227 response to the same environmental treatment were accordingly identified as environment-activated  
228 and characterized through homology search using CENSOR in Repbase (Kohany *et al.*, 2006).

229

## 230 **Results**

### 231 *Gene expression based on de novo transcriptome vs genome assembly*

232 We sequenced a total of 1489.6M raw sequencing reads including transcripts of *B. laevigata* expressed  
233 in seven tissues under control conditions (ENA accession PRJEB48599; ca. 386M PE-reads) and in 17  
234 replicated samples subjected to environmental treatments (ENA accession PRJEB48469; ca. 1103M PE-  
235 reads). After removal of 2.4% reads with putative sequencing errors and 35.1% of reads mapping to  
236 ribosomal RNA sequences across all RNAseq libraries, processed libraries contained between 11 and  
237 120M PE-reads (average of 37.2M reads per library; SI table 1).

238 The *de novo* transcriptome presented 238'720 genes and 429'166 isoforms (table 1), corresponding to  
239 16'397 protein sequences with  $\geq 80\%$  homology on swissprot, whereas 17'460 genes with  $\geq 80\%$   
240 homology to *A. thaliana* proteins were identified. Similar N50 values of CDS were achieved for the *de*  
241 *novo* transcriptome (1'599 bp), the *B. laevigata* genome assembly (1'979 bp) and the Araport11  
242 genome assembly of *A. thaliana* (1'611 bp). Completeness scores of BUSCO across references was over  
243 93% (table 1) and most (97.8%) input reads mapped back to the *de novo* transcriptome. The 17 libraries  
244 of environmental treatments mapped on average at 72.8% to the *de novo* transcriptome (SI table 3),  
245 and at 38.6% to the *B. laevigata* genome assembly (SI table 4). The *A. thaliana* RNAseq data (19  
246 libraries) mapped on average at 71.6% to the Araport11 CDS (SI table 5).

247 Of the 238'720 transcripts assembled in the *de novo* transcriptome of *B. laevigata*, 29'286 (12.3%)  
248 were expressed at  $\geq 1$  TPM. Similarly, the *B. laevigata* genome assembly presented 30'917 genes as  
249 expressed at  $\geq 1$  TPM (56.8% of the 54'457 genes), supporting convergent insights to be gathered from  
250 RNAseq, independent of the reference sequence. In *A. thaliana*, 21'036 genes were expressed at  $\geq 1$   
251 TPM (76.1% of the 27'655 genes in the Araport11 reference; table 1).

252

### 253 *Differential gene expression in response to environmental treatments*

254 Transcriptional responses to cold, heat, drought and herbivory were characterized and compared  
255 between *B. laevigata* and *A. thaliana* by the number of DEGs, the proportion of DEGs exclusive to a  
256 treatment, the number of synergistic DEGs (up-regulated in more than one treatment) and of  
257 antagonistic (i.e. trade-off) DEGs that are up- and down-regulated among treatments, as well as the  
258 strength of expression shifts (logFC).

259 Considering only genes presenting at least a two-fold shift in their expression ( $\log_{2}FC \geq 1$ , FDR  $< 0.001$ )  
260 in response to a treatment as DEGs, 3'959 (13.5% of transcripts expressed  $\geq 1$  TPM) and 4'172 (13.5%  
261 of genes expressed  $\geq 1$  TPM) unique DEGs were identified in the transcriptome- and genome-based  
262 analyses of *B. laevigata*, respectively (figure 1 and SI table 6). Analyses based on the *de novo*



263 transcriptome performed adequately, although identifying only 2'615 (62.7%) of the 4'172 DEGs  
264 identified using the genome-based approach. *Arabidopsis thaliana* revealed a larger proportion of  
265 DEGs than *B. laevigata*, with 7'320 unique DEGs (26.5% of all annotated genes; SI table 7).

266 The *B. laevigata* and *A. thaliana* DEG sets had 1'504 DEGs in common, likely representing a core set of  
267 environment-responsive genes in Brassicaceae. Noticeably, 3'983 of the DEGs identified in *A. thaliana*  
268 (i.e. 55% of its DEGs) presented constitutive expression above  $\geq 1$  TPM in *B. laevigata*, while 1'000 more  
269 were non-expressed ( $< 1$ TPM), suggesting that the alpine *B. laevigata* evolved constitutive expression  
270 of environment-responsive genes since divergence from the common ancestor with *A. thaliana*.

271 Contrasting patterns of expression changes between species were further apparent from the majority  
272 of genes being up-regulated (2'715; 5%) and only 1'562 genes (2.9%) being down-regulated in *B.*  
273 *laevigata*, whereas *A. thaliana* presented an opposite pattern with fewer up- (3'767; 13.6%) than  
274 down-regulated (4'552; 16.5%) genes (two-proportions Z-tests p-values  $< 0.001$ ; figure 1a). Most up-  
275 DEGs in *B. laevigata* responded to cold and herbivory, sharply contrasting with the majority of DEGs  
276 being down-regulated under these treatments in *A. thaliana* (figure 1b). In both species, cold and  
277 herbivory triggered the most treatment-specific sets of genes ( $> 80\%$  of cold- and herbivory-DEGs  
278 exclusive to those treatments), whereas the heat treatment shared a considerable number of DEGs  
279 with the response to cold. Drought triggered more treatment-unspecific genes in *B. laevigata* and *A.*  
280 *thaliana*, highlighting only 44% and 60% of exclusive DEGs respectively and indicating a pivotal role of  
281 genes involved in water homeostasis under our environmental treatments.

282 Transcriptional synergies across treatments were evaluated by proportions of identified synergistic  
283 DEGs. In *B. laevigata* seven genes were up-regulated in response to all environmental treatments,  
284 while *A. thaliana* presented only one such DEG (see Supplementary Text T1). Furthermore, *B. laevigata*  
285 presented more synergistic DEGs than *A. thaliana*, with 357 DEGs (8.5% of all DEGs) and 285 DEGs  
286 (3.9%; two-proportions Z-test p-value  $< 0.001$ ), respectively.

287 Contrastingly, *B. laevigata* presented 105 (2.5%) trade-off DEGs, representing a significantly lower  
288 proportion than in *A. thaliana* (999 out of 7'320, 13.6%; two-proportions Z-test, p-value  $< 0.001$ ). The  
289 105 trade-off DEGs in *B. laevigata* were involved in a total of 215 expression trade-offs across  
290 treatments, whereas the 999 genes of *A. thaliana* were involved in 2'187 trade-offs. Most identified  
291 trade-off DEGs were involved in cold and herbivory responses, with 50 out of 215 cases (23.3%) in *B.*  
292 *laevigata* and 788 cases (36.0%) in *A. thaliana*, whereas cold and heat responses further highlighted  
293 23 (10.7%) and 110 (5.0%) cases, respectively. The drought treatment triggered few trade-off DEGs in  
294 both species, with 9 and 70 for *B. laevigata* and *A. thaliana*, respectively.

295 Expression shifts of DEGs (SI figure 3) were significantly stronger in *B. laevigata* (average logFC = 3.21)  
296 compared to *A. thaliana* (average logFC = 2.55; Wilcoxon paired test p-value  $< 0.001$ ). Despite the

297 relatively few drought DEGs in *B. laevigata*, these genes achieved the strongest shifts in expression,  
298 with an average logFC of 5.21 for drought up- and of -4.98 for down-regulated genes. Such >30-fold  
299 change in the expression of drought-responding genes in *B. laevigata* strongly contrasted the drought  
300 response of *A. thaliana* that shifted expression the weakest under this treatment (logFCs of 1.58 and -  
301 1.61 for up- and down-regulated genes, respectively).

302

### 303 *Differential expression of transposable elements in response to environmental treatments*

304 Out of 8'646 full-length TE sequences in the *B. laevigata* genome, 299 TE copies presented differential  
305 expression (DE-TEs; logFC  $\geq 1$ , FDR  $< 0.001$ ) in response to cold, heat, drought or herbivory. The majority  
306 of DE-TEs (210) were up-regulated in response to a specific treatment (figure 2a). Environmentally  
307 triggered DE-TEs were distinguished from DE-TE copies being expressed following changes in  
308 expression of nearby genes, through the identification of clades presenting only related DE-TE copies  
309 responding to the same treatment. Two clades of LTR-*Copia* presented an expression pattern  
310 consistent with transcriptional activation by a specific environmental trigger (figure 2b). One of these  
311 TE clades presented clear up-regulation of seven copies in response to the heat treatment and showed  
312 strong homology to *TERESTRA* from multiple Brassicaceae. Another DE-TE clade presented consistent  
313 up-regulation of 27 copies under herbivory and included nine related copies showing clear homology  
314 to *Atcopia31* and 18 copies showing homology to *Atcopia93* (also called EVD). As genes located closest  
315 up- or down-stream of these DE-TEs showed no indication of co-expression (SI table 8), which suggests  
316 limited interactions between genes and TEs.

317

### 318 *Functional insights on genes controlled by environmental treatments*

319 As expected under environmental stress, all transcriptional responses to treatments were enriched in  
320 DEGs related to ABA, water homeostasis and oxidative stress in both *B. laevigata* and *A. thaliana* (SI  
321 tables 9-24).

322 Cold up-regulated genes in *B. laevigata* were chiefly involved in the “regulation of metabolic process”  
323 (222 DEGs) and “defense response” (201 DEGs). In particular, the cold response involved up-regulation  
324 of 82 genes annotated as “defense response to bacterium”, 40 genes annotated as “defense response  
325 to fungus”. On the other hand, down-regulation of genes annotated with “response to insect” (6 DEGs)  
326 and “response to herbivore” (5 DEGs) indicated a possible trade-off between cold response and  
327 defense against herbivores, but not against pathogens. In contrast, *A. thaliana* appeared to down-  
328 regulate pathogen defense in response to cold, as indicated by 75 down-DEGs related to “defense  
329 response to bacterium” and 47 down-DEGs annotated as “defense response to fungus”. In both

330 species, the cold treatment induced the up-regulation of *STCH4* (AT2G24500) that is known to confer  
331 cold tolerance through increased translation rates of *CBF* proteins and the accumulation of *CBF1-3*  
332 proteins (i.e. *DREB1b*, *DREB1c* and *DREB1a*). Furthermore, in both species the circadian clock genes  
333 *LHY* (AT1G01060) and *CCA1* (AT2G46830) were up-regulated under cold conditions. Starch metabolism  
334 also appeared affected by the cold treatments, as indicated by the up-regulation of the  $\beta$ -amylase  
335 genes *BAM1* (AT3G23920) and *BAM3* (AT4G17090).

336 Heat induced the up-regulation of genes involved in “protein folding” and “response to salt stress” GO-  
337 terms in both species (respectively, 60 and 50 DEGs in *B. laevigata* and 40 and 34 DEGs in *A. thaliana*).  
338 In *B. laevigata*, genes involved in “response to osmotic stress” (60 DEGs) and “response to ABA” (51  
339 DEGs) were up-regulated, while 11 DEGs involved in “photosynthesis” were down-regulated. In  
340 contrast, *A. thaliana* down-regulated “response to ABA” (17 DEGs) and up-regulated “photosynthesis”  
341 (5 DEGs). In both species, the chloroplast-localized *HSP21* (AT4G27670), the mitochondrion-localized  
342 *HSP23* (AT4G25200), the cytosolic *HSP90.1* (AT5G52640), *HSFA2* (AT2G26150) and *HSFA3*  
343 (AT5G03720). Similar to the cold response, the extreme heat treatment induced up-regulation of  
344 *BAM1* in both species, indicating that mobilization of starch may be important during temperature  
345 stress.

346 In both *B. laevigata* and *A. thaliana*, the drought response was enriched in DEGs related to “response  
347 to water deprivation” (27 and 5 DEGs) and “response to ABA” (27 and 9 DEGs) and, noticeably,  
348 “response to cold” (21 and 7 DEGs). Furthermore, *B. laevigata* up-regulated 24 genes responding to  
349 osmotic stress and down-regulated genes involved in “cell wall organization” (11 DEGs) and “pectin  
350 catabolic process” (4 DEGs), suggesting an impact on growth. On the other hand, *A. thaliana* up-  
351 regulated five genes involved in light harvesting of photosystem I and II, indicating short-term increase  
352 in photosynthesis under drought. Four genes were commonly drought up-regulated in both species,  
353 including the *highly ABA-induced PP2C gene 2* (*AIP1*; AT1G07430) involved in stomatal aperture, *PUB19*  
354 (AT1G660190, a U-Box E3 ubiquitin ligase), *AFP1* (AT1G69260, an ABA-involved transcription factor) and  
355 *AITR1* (AT3G27250, ABA-induced transcriptional repressor).

356 In both species, the herbivory treatment mainly induced genes involved in “defense response”,  
357 although considerably more numerous in *B. laevigata* (210 up-DEGs) than in *A. thaliana* (19 up-DEGs).  
358 Similarly, *B. laevigata* up-regulated more genes than *A. thaliana* involved in “signal transduction” (145  
359 and 37 DEGs, respectively), “response to jasmonic acid” (67 and 13) and “glucosinolate metabolic  
360 process” (37 and 3). Noticeably, down-regulation of genes involved in “cold-acclimation” and  
361 “response to cold” was apparent in both species, suggesting a general trade-off between herbivory  
362 and cold stresses. Indicative of a differential impact on growth, *B. laevigata* up-regulated 82 genes  
363 responding to ABA, whereas *A. thaliana* down-regulated 63 of them. More specifically, herbivory

364 induced up-regulation of *jasmonate-induced oxygenase 3* (*JAO3*, AT3G55970) in both species, although  
365 *P. xylostella* feeding on *B. laevigata* further induced the up-regulation of homologues of *terpene*  
366 *synthase 3* (*TPS03*, AT4G16740), which was down-regulated in *A. thaliana*. Similarly, *CYP79B2*  
367 (AT4G39950), a key enzyme of the glucosinolate biosynthesis, was identified as up-regulated under  
368 herbivory in *B. laevigata*.

369 The 1'504 DEGs shared among *B. laevigata* and *A. thaliana* presented enrichment in transcription  
370 factors (SI table 25), with 66 such putative environment-responsive master regulators identified in  
371 both species (SI table 26). They were related to growth (e.g. the *growth regulating factor 3* and 4;  
372 AT2G36400 and AT3G52910 respectively) and stress-related ethylene response factors (i.e. members  
373 of the *DREB* sub-family; AT1G12610, AT1G19210; AT1G64380; AT5G21960) as well as regulators of  
374 flowering and the circadian rhythm (e.g. *FLM* and *LHY*; AT1G77080 and AT1G01060, respectively).

375 In *B. laevigata*, the 357 synergistic DEGs were enriched in GO-terms related to water homeostasis and  
376 oxidative stress. Enrichment in DEGs related to “response to water deprivation” (45 DEGs), “response  
377 to abscisic acid” (43 DEGs), “response to salt stress” (36 DEGs) and “response to oxidative stress” (26  
378 DEGs; SI table 27) supported a general role of drought related genes in all our treatments. To a lesser  
379 extent, this was also the case for the 285 synergistic DEGs in *A. thaliana*, with enrichment of processes  
380 such as response to salt stress” (18 DEGs) and “response to oxidative stress” (15 DEGs; SI table 28)

381 Trade-off DEGs in *B. laevigata* were chiefly involved in biological processes such as “oxidation-  
382 reduction process” (15 DEGs), “carbohydrate metabolic process” (12 DEGs) and “response to water  
383 deprivation” (7 DEGs; SI table 29). Although *A. thaliana* trade-off DEGs were enriched in “response to  
384 cold” (52 DEGs), “response to ABA” (44 DEGs), they shared processes such as “oxidation-reduction  
385 process” (41 DEGs) and “response to water deprivation” (31 DEGs; SI table 30).

386 Among the numerous species-specific DEGs, the 2'158 *B. laevigata*-specific DEGs were mostly enriched  
387 in defense-, stress-, ABA-, as well as glucosinolate biosynthesis-related GO-terms (SI table 31), whereas  
388 the 5'816 DEGs specific to *A. thaliana* appeared to be predominantly enriched in terms related to  
389 “regulation of transcription, DNA-templated” and “translation” (SI table 32).

390 A considerable number of DEGs specific to *A. thaliana* (4'983) did not present differential expression  
391 in *B. laevigata*, with a majority of them (3'983) presenting constitutive expression  $\geq 1$  TPM in that  
392 species. Enrichment in functions such as “response to ABA”, “response to cold”, “response to heat”  
393 and “response to water deprivation” suggested a persistent basal expression of abiotic stress-related  
394 genes in the alpine species. Consistent with the slow growth and perennial life strategy of *B. laevigata*,  
395 these constitutively-expressed genes were involved in energy intensive processes such as “protein  
396 phosphorylation”, “photosynthesis” and “circadian rhythm” (153, 35 and 33 genes respectively; SI  
397 table 33) .

398

399 *Transcriptional architecture of responses to environmental changes*

400 Considering genes showing substantial expression variance across samples of *B. laevigata* (41'613  
401 genes out of 54'457) and *A. thaliana* (26'051 out of 27'655), weighted gene co-expression network  
402 analysis grouped them into modules based on their correlated expression profiles across  
403 environmental treatments. Although the *B. laevigata* co-expression network encompassed  
404 considerably more genes, expression profiles resolved into 78 modules containing between 35 and  
405 2'440 genes (SI table 34), whereas *A. thaliana* presented 93 modules containing between 36 and 3'002  
406 genes (SI table 35). Networks of the most strongly connected DEGs (i.e. DEG-networks) included 2'625  
407 DEGs in *B. laevigata* and 4'465 DEGs in *A. thaliana* (figure 3). The DEG-network in *B. laevigata*  
408 delineated four distinct subnetworks of up-regulated DEGs specific to either cold, heat, drought or  
409 herbivory responses and a fifth subnetwork consisting of mostly down-regulated DEGs (SI figure 4). In  
410 contrast to such a modular organisation of DEGs in *B. laevigata*, the DEG-network of *A. thaliana*  
411 presented overall higher correlations across gene expression profiles and a diffuse distribution of  
412 treatment-specific up-DEGs (SI figure 5). Together with the considerable number of *A. thaliana* DEGs  
413 being constitutively expressed in *B. laevigata*, this suggest a differential architecture of transcriptional  
414 plasticity between species.

415 Most of the 1'504 DEGs identified in both *B. laevigata* and *A. thaliana* (i.e. 1'351 and 888 DEGs,  
416 respectively) appeared highly connected and were located across DEG-networks (SI figure 6). Out of  
417 the 66 environment-responsive transcription factors identified in both species, 15 and 31 were highly  
418 connected to their respective network and highlighted a conserved set of environment-responsive  
419 genes connected to species-specific DEGs.

420 Synergistic DEGs appeared predominantly located at the intersections of treatment-specific  
421 subnetworks in *B. laevigata*, highlighting their role in multiple transcriptional responses (figure 4a).  
422 The drought subnetwork comprised several such DEGs, as well as four of the seven genes up-regulated  
423 in all treatments, highlighting the synergistic role of drought-DEGs to environmental changes. This  
424 further contrasted with the few synergistic DEGs of *A. thaliana*, which appeared located among several  
425 loose clusters rather than at the intersections between clusters (figure 4b). Trade-off DEGs were  
426 contrastingly located within treatment specific subnetworks in *B. laevigata*, whereas they were  
427 distributed across the DEG-network in *A. thaliana*.

428

## 429 **Discussion**

430 Promoting accurate characterization of transcriptional changes in non-model organisms responding to  
431 environmental changes, RNAseq approaches offer crucial functional insights and foster our  
432 understanding of phenotypic plasticity. Relying on a replicated experimental design supporting reliable  
433 conclusions (Conesa *et al.*, 2016), the quantification of expression based on both a *de novo*  
434 transcriptome or a genome assembly here highlighted similar transcriptional changes in response to  
435 cold, heat, drought and herbivory. As evaluated by publicly available data from the related model plant  
436 *A. thaliana* subjected to same environmental treatments, credible patterns of gene expression were  
437 identified and supported sensitive insights to be gathered by RNAseq in non-model organisms.  
438 However, focusing on loci expressed  $\geq 1$  TPM (12.3% of all *de novo* assembled genes) appeared  
439 necessary to evaluate biologically meaningful transcripts and promote comparability of *de novo*- vs  
440 genome-based insights. As signals of differential expression may be under-estimated with the former  
441 approach, mainly due to inaccurate resolution of gene models (Li & Dewey, 2011), genome-based  
442 quantification of gene expression should however be favoured when possible (Wang & Gribskov,  
443 2017).

### 444 445 *Plant transcriptional responses to environmental changes*

446 Gene expression was here quantified late after the onset of environmental changes and thus likely  
447 characterized new transcriptional steady states, potentially emphasizing on newly reached  
448 homeostasis rather than early signalling and responses (Kollist *et al.*, 2019; Zhang *et al.*, 2022).  
449 Accordingly, differential expression of typical early responding genes, such as *CBF1-3* under cold (Park  
450 *et al.*, 2015) was detected in neither species, while downstream targets such as *STCH4* (Yu *et al.*, 2020)  
451 were induced. Functions of the 1'504 DEGs shared by *B. laevigata* and *A. thaliana*, including 66 DNA-  
452 templated transcription factors, were indicative of changes underlying resource allocation and growth  
453 in response to environmental changes. In particular, the induction of circadian clock genes *CCA1* and  
454 *LHY* (Kyung *et al.*, 2022) support a role of starch mobilisation to not only supply energy for growth  
455 under abiotic stresses (Moraes *et al.*, 2022), but also as a source of osmolytes controlling stomata  
456 opening (Thalman & Santelia, 2017). Accordingly, synergistic up-regulation of the starch degrading  $\beta$ -  
457 amylase *BAM1* under our cold and heat treatments, as well as up-regulation of *BAM3* under cold,  
458 indicate that both species rely on leaf starch during abiotic treatments tested here.

459 While herbivory treatments differed by the use of the generalist *P. xylostella* in *B. laevigata* and the  
460 Brassicaceae specialist *P. rapae* in *A. thaliana*, relatively few herbivore-specific transcriptional changes  
461 were detected, as expected by similar responses to *P. rapae* and the generalist *Spodoptera littoralis* in  
462 *A. thaliana* (Reymond *et al.*, 2004). Several herbivory-responsive genes presented contrasted

463 expression changes between species, with *P. xylostella* inducing up-regulation of homologues of *TPS03*  
464 (producing defense-related terpenoids; Huang *et al.*, 2010; Knauer *et al.*, 2018) in *B. laevigata*, whereas  
465 it was down-regulated following attack by *P. rapae* in *A. thaliana*. Similarly, as expected following the  
466 evolutionary arm race between specialist herbivores and Brassicaceae (Edger *et al.*, 2015), the enzyme  
467 catalysing the first step in glucosinolate biosynthesis *CYP79B2* was also strongly up-regulated in *B.*  
468 *laevigata*, but un-induced by *P. rapae* in *A. thaliana*.

469 Differential expression of TEs in *B. laevigata* identified clades of interspersed *Copia* retrotransposons  
470 being up-regulated following a specific environmental treatment and indicating TE transcriptional  
471 activation (Grandbastien, 2015). Although only loosely related to the iconic heat-induced TE *ONSEN*  
472 (Ito *et al.*, 2011), copies of *TERESTRA* were shown as massively up-regulated under heat in *B. laevigata*,  
473 as they also do in other Brassicaceae (Pietzenuk *et al.*, 2016). Similarly, 18 copies of a *Copia*  
474 retrotransposon homologous to *Atcopia93* (or *EVD*) were identified as herbivory-induced, consistent  
475 with this TE being known as transcriptionally and transpositionally activated in *A. thaliana* (Marí-  
476 Ordóñez *et al.*, 2013) following plant immune response (Zervudacki *et al.*, 2018). Contrastingly, nine  
477 related copies of a *Copia* retrotransposon homologous to *Atcopia31* were identified as specifically  
478 herbivory-induced in *B. laevigata*, although it was surmised as heat-activated in *A. thaliana* (Quadrana  
479 *et al.*, 2016; Pietzenuk *et al.*, 2016). Although neither the extent to which such environment-responsive  
480 TE transcription supports transposition events, nor potential consequences of such regulation in  
481 natural population is known, RNAseq enabled an accurate characterization of responses of TEs to  
482 environmental changes in a non-model species.

483

#### 484 *Modular transcriptional changes under environmental changes*

485 The overall up-regulation of genes and the stronger shifts in expression in *B. laevigata* markedly  
486 contrasted with chiefly down-regulation and weaker shifts in *A. thaliana* towards new transcriptional  
487 steady states under environmental changes. Over 50% DEGs in *A. thaliana* showed constitutive  
488 expression in *B. laevigata*, suggesting that the stress-tolerant alpine species is constantly expressing  
489 genes used to cope with specific environmental changes in the model species. To what extent such  
490 constitutive expression is costly and adaptive, explaining the slow growth and limited competitive  
491 ability of *B. laevigata*, deserves additional work.

492 Although presenting the smallest number of DEGs in both species, the drought treatment involved  
493 unusually large proportions of DEGs that shifted their expression under at least another treatment,  
494 suggesting that genes related to water homeostasis are central to transcriptional responses to  
495 environmental changes. Consistent with a key role of drought-responsive genes in transcriptional  
496 responses to other abiotic and biotic stressors, they showed particularly strong expression shifts in *B.*

497 *laevigata* and formed a central DEG-subnetwork involving a majority of the up-regulated DEGs by all  
498 treatments, including several other synergistic DEGs, but none of the identified trade-off DEGs.

499 Modules of co-expressed genes further characterized the architecture of transcriptional changes in  
500 response to cold, heat, drought and herbivory. In particular, the highly-structured DEG-network in *B.*  
501 *laevigata* presented clearly distinct subnetworks of co-regulated genes in response to each treatment  
502 and limited interactions among environment-specific subnetworks, supporting a modular  
503 transcriptional plasticity in response to environmental changes in *B. laevigata*. Although the extent to  
504 which such a highly modular transcriptional changes promote stress tolerance in *B. laevigata* remains  
505 out of scope, it sharply contrasts the observed architecture of transcriptional changes in *A. thaliana*,  
506 where up-DEGs responding to one environmental treatment were subnetwork-specific and synergistic  
507 DEGs were located within clusters rather than at their intersections. Consistent with highly integrated  
508 transcriptional responses to environmental changes, the fast-cycling *A. thaliana* further presented a  
509 considerably higher number of trade-off DEGs distributed across the entire network, compared to the  
510 few trade-off DEGs central to treatment-specific subnetworks in *B. laevigata*. As expected under  
511 decreasing herbivory pressure in colder climates (Rasmann *et al.*, 2014), the largest proportion of  
512 trade-off DEGs were involved in unlikely simultaneous cold and herbivory stressors, in both species.  
513 Although experiments involving several unique treatments offer key transcriptional insights, multiple  
514 environmental stressors can be expected to simultaneously occur in nature. These result in non-  
515 additive transcriptional responses that remain to be considered, to fully understand transcriptional  
516 plasticity (Atkinson & Urwin, 2012; Suzuki *et al.*, 2014; Prasch & Sonnewald, 2015).

517 As both species differ by multiple traits, underpinnings of their different transcriptional responses to  
518 environmental changes remain elusive. However, *B. laevigata* is a long-lived perennial that  
519 strategically allocates resources to tolerate stress while maintaining growth and reproduction,  
520 whereas the short-lived *A. thaliana* likely maximizes growth and reproduction by avoiding  
521 environmental stresses (Lundgren & des Marais, 2020). To what extent different ecological strategies  
522 (Grime, 1977; Diaz *et al.*, 2016) and costs associated with plastic stress tolerance select for different  
523 transcriptional architectures shall be addresses with similar data from a larger set of species.  
524 Furthermore, *B. laevigata* has undergone an additional whole-genome duplication event as compared  
525 to *A. thaliana* (Geiser *et al.*, 2016) and numerous environment-responsive genes were here found with  
526 multiple homologues showing variable responses to treatments. To what extent the initial redundancy  
527 resulting from gene duplication supports robustness (Wagner, 1994, 2002) and contributed to the  
528 evolution of modular transcriptional responses remains to be investigated.

529



530 **Data statement**

531 The 17 RNAseq raw read files of the *B. laevigata* leaf transcriptomes under environmental stress are  
532 available in the European Nucleotide Archive (ENA accession: PRJEB48469). The seven RNAseq raw  
533 read files of the *B. laevigata* tissue atlas are available under ENA accession PRJEB48599.

534

535 **Acknowledgements**

536 We thank C. Ball and J. Sekulovski for taking excellent care of our plants, C. Robert for support in  
537 designing the herbivory experiment and T. Züst for support in data analysis. Thanks to V. Ernst, T. Bürki,  
538 V. Pulver, A. Metry for advice and fruitful discussions. Thanks to S. Grünig, N. Schenk and J. Schröder  
539 for helpful comments on the manuscript. This research was funded by the Swiss National Science  
540 Foundation (Grant 31003A\_178938).

541

542 **Author contributions**

543 MB and CP designed the research; MB and RRC collected data, MB and BM analysed data, MB and CP  
544 interpreted data; MB and CP wrote the manuscript.

545

546 **Conflict of interest**

547 The authors declare no conflict of interest.

548

549 **Supporting Information**

550 SI tables 1 and 2: List of *B. laevigata* and *A. thaliana* RNAseq libraries.

551 SI tables 3 and 4: Mapping rates of the 17 *B. laevigata* environmental treatment RNAseq libraries to  
552 the *de novo* transcriptome and genome assembly.

553 SI tables 5: Mapping rates of the 19 *A. thaliana* RNAseq libraries to the Araport11 coding sequences.

554 SI tables 6 and 7: Lists of *B. laevigata* and *A. thaliana* DEGs with log<sub>2</sub>-fold-changes.

555 SI table 8: Proximity of genes to environmentally induced transposable elements.

556 SI tables 9-25: GO-enrichment of DEGs under cold, heat, drought and herbivory.

557 SI table 26: Annotation of the transcription factors shared between *B. laevigata* and *A. thaliana*.

558 SI tables 27-33: GO-enrichment of synergistic DEGs, trade-off DEGs, species specific DEGs and *A.*  
559 *thaliana* DEGs with constitutive expression in *B. laevigata*.

560 SI tables 34 and 35: Co-expression modules and their correlations to treatments.

561 SI figure 1. Number of expressed genes in tissues used for the *Biscutella laevigata de novo*  
562 transcriptome assembly.

563 SI figure 2. Setup of the herbivory treatment for *Biscutella laevigata* and feeding damage caused by  
564 *Plutella xylostella* larvae.

565 SI figure 3. Absolute log<sub>2</sub>-fold changes (logFC) of differentially expressed genes in *Biscutella laevigata*  
566 and *Arabidopsis thaliana* under environmental treatments (cold, heat, drought and herbivory).

567 SI figure 4. The *Biscutella laevigata* co-expression network with differentially expressed genes in  
568 response to cold, heat, drought and herbivory treatments forming separate clusters.

569 SI figure 5. The *Arabidopsis thaliana* co-expression network with differentially expressed genes in  
570 cold, heat, drought and herbivory treatments highlighted in red.

571 SI figure 6. Differentially expressed genes shared by *Biscutella laevigata* and *Arabidopsis thaliana*  
572 highlighted across co-expression networks.

573 Supplementary text T1: Central synergistic DEGs and their network neighbours

574

575 **References**

- 576
- 577 **Alexa A, Rahnenführer J, Lengauer T. 2006.** Improved scoring of functional groups from gene  
578 expression data by decorrelating GO graph structure. *Bioinformatics* **22**: 1600–1607.
- 579 **Andrews S. 2010.** FastQC: A quality control tool for high throughput sequence data.  
580 <http://www.bioinformatics.babraham.ac.uk/projects/fastqc/>.
- 581 **Atkinson NJ, Urwin PE. 2012.** The interaction of plant biotic and abiotic stresses: from genes to the  
582 field. *Journal of Experimental Botany* **63**: 3523–3543.
- 583 **Babst-Kostecka AA, Waldmann P, Frérot H, Vollenweider P. 2016.** Plant adaptation to metal polluted  
584 environments - Physiological, morphological, and evolutionary insights from *Biscutella laevigata*.  
585 *Environmental and Experimental Botany* **127**: 1–13.
- 586 **Benjamini Y, Hochberg Y. 1995.** Controlling the false discovery rate: a practical and powerful approach  
587 to multiple testing. *Journal of the Royal Statistical Society* **57**: 289–300.
- 588 **Berardini TZ, Mundodi S, Reiser L, Huala E, Garcia-Hernandez M, Zhang P, Mueller LA, Yoon J, Doyle  
589 A, Lander G, et al. 2004.** Functional annotation of the Arabidopsis genome using controlled  
590 vocabularies. *Plant Physiology* **135**: 745–755.
- 591 **Bryant DM, Johnson K, DiTommaso T, Tickle T, Couger MB, Payzin-Dogru D, Lee TJ, Leigh ND, Kuo T-  
592 H, Davis FG, et al. 2017.** A tissue-mapped Axolotl de novo transcriptome enables identification of limb  
593 regeneration factors. *Cell Reports* **18**: 762–776.
- 594 **Bürki T, Pulver V, Grünig S, Čertner M, Parisod C. 2023.** Adaptive differentiation on serpentine soil in  
595 diploid versus autotetraploid populations of *Biscutella laevigata* (Brassicaceae). *Oikos* (currently under  
596 review).
- 597 **Caarls L, Elberse J, Awwanah M, Ludwig NR, de Vries M, Zeilmaker T, van Wees SCM, Schuurink RC,  
598 van den Ackerveken G. 2017.** Arabidopsis Jasmonate-induced oxygenases down-regulate plant  
599 immunity by hydroxylation and inactivation of the hormone jasmonic acid. *Proceedings of the National  
600 Academy of Sciences of the United States of America* **114**: 6388–6393.
- 601 **Cheng CY, Krishnakumar V, Chan AP, Thibaud-Nissen F, Schobel S, Town CD. 2017.** Araport11: a  
602 complete reannotation of the *Arabidopsis thaliana* reference genome. *Plant Journal* **89**: 789–804.
- 603 **Claeys H, Inzé D. 2013.** The agony of choice: How plants balance growth and survival under water-  
604 limiting conditions. *Plant Physiology* **162**: 1768–1779.
- 605 **Conesa A, Madrigal P, Tarazona S, Gomez-Cabrero D, Cervera A, McPherson A, Szczesniak MW,  
606 Gaffney DJ, Elo LL, Zhang X, et al. 2016.** A survey of best practices for RNA-seq data analysis. *Genome  
607 Biology* **17**:13.
- 608 **Couvreur TLP, Franzke A, Al-Shehbaz IA, Bakker FT, Koch MA, Mummenhoff K. 2010.** Molecular  
609 phylogenetics, temporal diversification, and principles of evolution in the mustard family  
610 (Brassicaceae). *Molecular Biology and Evolution* **27**: 55–71.
- 611 **Csete M, Doyle J. 2004.** Bow ties, metabolism and disease. *Trends in Biotechnology* **22**: 446–450.
- 612 **Devoto A, Turner JG. 2005.** Jasmonate-regulated Arabidopsis stress signalling network. *Physiologia  
613 Plantarum* **123**: 161–172.
- 614 **Díaz S, Kattge J, Cornelissen JHC, Wright IJ, Lavorel S, Dray S, Reu B, Kleyer M, Wirth C, Colin  
615 Prentice I, et al. 2016.** The global spectrum of plant form and function. *Nature* **529**: 167–171.
- 616 **Dubois M, Claeys H, van den Broeck L, Inzé D. 2017.** Time of day determines Arabidopsis transcriptome  
617 and growth dynamics under mild drought. *Plant Cell and Environment* **40**: 180–189.
- 618 **Edger PP, Heide-Fischer HM, Bekaert M, Rota J, Glöckner G, Platts AE, Heckel DG, Der JP, Wafula EK,  
619 Tang M, et al. 2015.** The butterfly plant arms-race escalated by gene and genome duplications.  
620 *Proceedings of the National Academy of Sciences of the United States of America* **112**: 8362–8366.
- 621 **Ehling J, Chowrira SG, Mattheus N, Aeschliman DS, Arimura G-I, Bohlmann J. 2008.** Comparative  
622 transcriptome analysis of *Arabidopsis thaliana* infested by diamond back moth (*Plutella xylostella*)  
623 larvae reveals signatures of stress response, secondary metabolism, and signalling. *BMC Genomics* **9**:  
624 154.
- 625 **Ewels P, Magnusson M, Lundin S, Käller M. 2016.** MultiQC: summarize analysis results for multiple  
626 tools and samples in a single report. *Bioinformatics* **32**: 3047–3048.

- 627 **Fujita M, Fujita Y, Takahashi F, Yamaguchi-Shinozaki K, Shinozaki K. 2009.** *Stress physiology of higher*  
628 *plants: cross-talk between abiotic and biotic stress signalling* (H Hirt, Ed.). Wiley Online Library.
- 629 **Garcia ME, Lynch T, Peeters J, Snowden C, Finkelstein R. 2008.** A small plant-specific protein family of  
630 ABI five binding proteins (AFPs) regulates stress response in germinating Arabidopsis seeds and  
631 seedlings. *Plant Molecular Biology* **67**: 643–658.
- 632 **Geiser C, Mandáková T, Arrigo N, Lysak MA, Parisod C. 2016.** Repeated whole-genome duplication,  
633 karyotype reshuffling, and biased retention of stress-responding genes in Buckler Mustard. *Plant Cell*  
634 **28**: 17–27.
- 635 **Grabherr MG, Haas BJ, Yassour M, Levin JZ, Thompson DA, Amit I, Adiconis X, Fan L, Raychowdhury**  
636 **R, Zeng Q, et al. 2011.** Full-length transcriptome assembly from RNA-Seq data without a reference  
637 genome. *Nature Biotechnology* **29**: 644–652.
- 638 **Grandbastien MA. 2015.** LTR retrotransposons, handy hitchhikers of plant regulation and stress  
639 response. *Biochimica et Biophysica Acta* **1849**: 403–416.
- 640 **Grime JP. 1977.** Evidence for the existence of three primary strategies in plants and its relevance to  
641 ecological and evolutionary theory. *American Naturalist* **111**: 1169–1194.
- 642 **Haas BJ, Papanicolaou A, Yassour M, Grabherr M, Blood PD, Bowden J, Couger MB, Eccles D, Li B,**  
643 **Lieber M, et al. 2013.** De novo transcript sequence reconstruction from RNA-seq using the Trinity  
644 platform for reference generation and analysis. *Nature Protocols* **8**: 1494–1512.
- 645 **Hendriks KP, Kiefer C, Al-Shehbaz IA, Bailey CD, van Huysduynen A, Nikolov LA, Nauheimer L, Zuntini**  
646 **AR, German DA, Franzke A, et al. 2022.** Global phylogeny of the Brassicaceae provides important  
647 insights into gene discordance. *bioRxiv* <https://doi.org/10.1101/2022.09.01.506188>.
- 648 **Howe GA, Jander G. 2008.** Plant immunity to insect herbivores. *Annual Review of Plant Biology* **59**: 41–  
649 66.
- 650 **Huang M, Abel C, Sohrabi R, Petri J, Haupt I, Cosimano J, Gershenzon J, Tholl D. 2010.** Variation of  
651 herbivore-induced volatile terpenes among Arabidopsis ecotypes depends on allelic differences and  
652 subcellular targeting of two terpene synthases, TPS02 and TPS03. *Plant Physiology* **153**: 1293–1310.
- 653 **Ito H, Gaubert H, Bucher E, Mirouze M, Vaillant I, Paszkowski J. 2011.** An siRNA pathway prevents  
654 transgenerational retrotransposition in plants subjected to stress. *Nature* **472**: 115–120.
- 655 **Jacob P, Hirt H, Bendahmane A. 2017.** The heat-shock protein/chaperone network and multiple stress  
656 resistance. *Plant Biotechnology Journal* **15**: 405–414.
- 657 **Jeong HH, Yalamanchili HK, Guo C, Shulman JM, Liu Z. 2018.** An ultra-fast and scalable quantification  
658 pipeline for transposable elements from next generation sequencing data. *Pacific Symposium on*  
659 *Biocomputing* **23**:168–179.
- 660 **Katoh K, Misawa K, Kuma K-I, Miyata T. 2002.** MAFFT: a novel method for rapid multiple sequence  
661 alignment based on fast Fourier transform. *Nucleic Acids Research* **30**: 3059–3066.
- 662 **Kitano H. 2004.** Biological robustness. *Nature Reviews Genetics* **5**: 826–837.
- 663 **Klepikova A v, Kasianov AS, Gerasimov ES, Logacheva MD, Penin AA. 2016.** A high resolution map of  
664 the *Arabidopsis thaliana* developmental transcriptome based on RNA-seq profiling. *Plant Journal* **88**:  
665 1058–1070.
- 666 **Knauer AC, Bakhtiari M, Schiestl FP. 2018.** Crab spiders impact floral-signal evolution indirectly  
667 through removal of florivores. *Nature Communications* **9**:1367.
- 668 **Kohany O, Gentles AJ, Hankus L, Jurka J. 2006.** Annotation, submission and screening of repetitive  
669 elements in Repbase: RepbaseSubmitter and Censor. *BMC Bioinformatics* **7**: 474.
- 670 **Kollist H, Zandalinas SI, Sengupta S, Nuhkat M, Kangasjärvi J, Mittler R. 2019.** Rapid responses to  
671 abiotic stress: Priming the landscape for the signal transduction network. *Trends in Plant Science* **24**:  
672 25–37.
- 673 **Körner C, Hiltbrunner E. 2021.** Why is the alpine flora comparatively robust against climatic warming?  
674 *Diversity* **13**: 383.
- 675 **Kyung J, Jeon M, Jeong G, Shin Y, Seo E, Yu J, Kim H, Park C-M, Hwang D, Lee I. 2022.** The two clock  
676 proteins CCA1 and LHY activate VIN3 transcription during vernalization through the vernalization-  
677 responsive cis-element. *The Plant Cell* **34**: 1020–1037.

- 678 **Langfelder P, Horvath S. 2008.** WGCNA: an R package for weighted correlation network analysis. *BMC*  
679 *Bioinformatics* **9**: 559.
- 680 **Langmead B, Salzberg SL. 2012.** Fast gapped-read alignment with Bowtie 2. *Nature Methods* **9**: 357–  
681 359.
- 682 **Larkindale J, Vierling E. 2008.** Core genome responses involved in acclimation to high temperature.  
683 *Plant Physiology* **146**: 748–761.
- 684 **Letunic I, Bork P. 2021.** Interactive tree of life (iTOL) v5: An online tool for phylogenetic tree display  
685 and annotation. *Nucleic Acids Research* **49**: 293–296.
- 686 **Li B, Dewey CN. 2011.** RSEM: accurate transcript quantification from RNA-Seq data with or without a  
687 reference genome. *BMC Bioinformatics* **12**:323.
- 688 **Li B, Ruotti V, Stewart RM, Thomson JA, Dewey CN. 2009.** RNA-Seq gene expression estimation with  
689 read mapping uncertainty. *Bioinformatics* **26**: 493–500.
- 690 **Liu YC, Wu YR, Huang XH, Sun J, Xie Q. 2011.** AtPUB19, a U-Box E3 ubiquitin ligase, negatively regulates  
691 abscisic acid and drought responses in *Arabidopsis thaliana*. *Molecular Plant* **4**: 938–946.
- 692 **Lundgren MR, des Marais DL. 2020.** Life history variation as a model for understanding trade-offs in  
693 plant–environment interactions. *Current Biology* **30**: 180–189.
- 694 **Manni M, Berkeley MR, Seppey M, Simão FA, Zdobnov EM. 2021.** BUSCO Update: Novel and  
695 Streamlined Workflows along with Broader and Deeper Phylogenetic Coverage for Scoring of  
696 Eukaryotic, Prokaryotic, and Viral Genomes. *Molecular biology and evolution* **38**: 4647–4654.
- 697 **Manton I. 1937.** The problem of *Biscutella laevigata* L.: II. The evidence from meiosis. *Annals of Botany*  
698 **1**: 439–462.
- 699 **Marí-Ordóñez A, Marchais A, Etcheverry M, Martin A, Colot V, Voinnet O. 2013.** Reconstructing de  
700 novo silencing of an active plant retrotransposon. *Nature Genetics* **45**: 1029–1039.
- 701 **Moraes AT, Mengin V, Peixoto B, Encke B, Krohn N, Höhne M, Krause U, Stitt M. 2022.** The circadian  
702 clock mutant *lhy cca1 elf3* paces starch mobilization to dawn despite severely disrupted circadian clock  
703 function. *Plant Physiology* **189**: 2332–2356.
- 704 **Munemasa S, Hauser F, Park J, Waadt R, Brandt B, Schroeder JI. 2015.** Mechanisms of abscisic acid-  
705 mediated control of stomatal aperture. *Current Opinion in Plant Biology* **28**: 154–162.
- 706 **Nakashima K, Ito Y, Yamaguchi-Shinozaki K. 2009.** Transcriptional regulatory networks in response to  
707 abiotic stresses in *Arabidopsis* and grasses. *Plant Physiology* **149**: 88–95.
- 708 **Nallu S, Hill JA, Don K, Sahagun C, Zhang W, Meslin C, Snell-Rood E, Clark NL, Morehouse NI,  
709 Bergelson J, et al. 2018.** The molecular genetic basis of herbivory between butterflies and their host  
710 plants. *Nature Ecology & Evolution* **2**: 1418–1427.
- 711 **Parisod C, Besnard G. 2007.** Glacial in situ survival in the Western Alps and polytopic autopolyploidy in  
712 *Biscutella laevigata* L. (Brassicaceae). *Molecular Ecology* **16**: 2755–2767.
- 713 **Park S, Lee CM, Doherty CJ, Gilmour SJ, Kim Y, Thomashow MF. 2015.** Regulation of the *Arabidopsis*  
714 CBF regulon by a complex low-temperature regulatory network. *Plant Journal* **82**: 193–207.
- 715 **Pietzenuk B, Markus C, Gaubert H, Bagwan N, Merotto A, Bucher E, Pecinka A. 2016.** Recurrent  
716 evolution of heat-responsiveness in Brassicaceae COPIA elements. *Genome Biology* **17**: 209.
- 717 **Prasch CM, Sonnewald U. 2015.** Signaling events in plants: Stress factors in combination change the  
718 picture. *Environmental and Experimental Botany* **114**: 4–14.
- 719 **Primmer CR, Papakostas S, Leder EH, Davis MJ, Ragan MA. 2013.** Annotated genes and nonannotated  
720 genomes: Cross-species use of Gene Ontology in ecology and evolution research. *Molecular Ecology*  
721 **22**: 3216–3241.
- 722 **Quadrana L, Silveira AB, Mayhew GF, Leblanc C, Martienssen RA, Jeddelloh JA, Colot V. 2016.** The  
723 *Arabidopsis thaliana* mobilome and its impact at the species level. *eLife*  
724 <https://doi.org/10.7554/eLife.15716.001>.
- 725 **Quinlan AR, Hall IM. 2010.** BEDTools: A flexible suite of utilities for comparing genomic features.  
726 *Bioinformatics* **26**: 841–842.
- 727 **Rasmann S, Pellissier L, Defossez E, Jactel H, Kunstler G. 2014.** Climate-driven change in plant-insect  
728 interactions along elevation gradients. *Functional Ecology* **28**: 46–54.

- 729 **Reymond P, Bodenhausen N, van Poecke RMP, Krishnamurthy V, Dicke M, Farmer EE. 2004.** A  
730 conserved transcript pattern in response to a specialist and a generalist herbivore. *Plant Cell* **16**: 3132–  
731 3147.
- 732 **Robinson MD, McCarthy DJ, Smyth GK. 2009.** edgeR: a Bioconductor package for differential  
733 expression analysis of digital gene expression data. *Bioinformatics* **26**: 139–140.
- 734 **Robinson MD, Oshlack A. 2010.** A scaling normalization method for differential expression analysis of  
735 RNA-seq data. *Genome Biology* **11**:R25.
- 736 **Shannon P, Markiel A, Ozier O, Baliga NS, Wang JT, Ramage D, Amin N, Schwikowski B, Ideker T.  
737 2003.** Cytoscape: A software environment for integrated models of biomolecular interaction networks.  
738 *Genome Research* **13**: 2498–2504.
- 739 **Song L, Florea L. 2015.** Rcorrector: efficient and accurate error correction for Illumina RNA-seq reads.  
740 *GigaScience* **4**: 48.
- 741 **Stearns SC, Magwene P. 2003.** The naturalist in a world of genomics. *American Naturalist* **161**: 171–  
742 180.
- 743 **Suzuki N, Rivero RM, Shulaev V, Blumwald E, Mittler R. 2014.** Abiotic and biotic stress combinations.  
744 *New Phytologist* **203**: 32–43.
- 745 **Thalmann M, Santelia D. 2017.** Starch as a determinant of plant fitness under abiotic stress. *New  
746 Phytologist* **214**: 943–951.
- 747 **Tremetsberger K, König C, Samuel R, Pinsker W, Stuessy TF. 2002.** Intraspecific genetic variation in  
748 *Biscutella laevigata* (Brassicaceae): new focus on Irene Manton’s hypothesis. *Plant Systematics and  
749 Evolution* **233**: 163–181.
- 750 **VanWallendael A, Soltani A, Emery NC, Peixoto MM, Olsen J, Lowry DB. 2019.** A molecular view of  
751 plant local adaptation: Incorporating stress-response networks. *Annual Reviews of Plant Biology* **70**:  
752 559–583.
- 753 **Wagner A. 1994.** Evolution of gene networks by gene duplications: A mathematical model and its  
754 implications on genome organization (transcriptional regulation/molecular evolution/homeobox  
755 gene). *Proceedings of the National Academy of Sciences USA* **91**: 4387–4391.
- 756 **Wagner A. 2002.** Selection and gene duplication: a view from the genome. *Genome Biology* **3**:1012.
- 757 **Wagner GP, Kin K, Lynch VJ. 2012.** Measurement of mRNA abundance using RNA-seq data: RPKM  
758 measure is inconsistent among samples. *Theory in Biosciences* **131**: 281–285.
- 759 **Wang S, Gribkov M. 2017.** Comprehensive evaluation of de novo transcriptome assembly programs  
760 and their effects on differential gene expression analysis. *Bioinformatics* **33**: 327–333.
- 761 **Yu H, Kong X, Huang H, Wu W, Park J, Yun DJ, Lee B ha, Shi H, Zhu JK. 2020.** STCH4/REIL2 confers cold  
762 stress tolerance in *Arabidopsis* by promoting rRNA processing and CBF protein translation. *Cell Reports*  
763 **30**: 229-242.e5.
- 764 **Zervudacki J, Yu A, Ameseffe D, Wang J, Drouaud J, Navarro L, Deleris A. 2018.** Transcriptional control  
765 and exploitation of an immune-responsive family of plant retrotransposons. *The EMBO Journal* **37**:  
766 e98482.
- 767 **Zhang H, Zhu J, Gong Z, Zhu JK. 2022.** Abiotic stress responses in plants. *Nature Reviews Genetics* **23**:  
768 104–119.
- 769

770 **Tables**

771

772 **Table 1.** Quality metrics of the three sequence references used to quantify gene expression under environmental treatments

| Reference sequence                                     | Number of genes (splicing variants) | BUSCO score of reference <sup>#</sup>      | Genes expressed at $\geq 1$ TPM <sup>#</sup> | BUSCO score of filtered reference <sup>#</sup> | N50      | Unique DEGs <sup>∇</sup> |
|--------------------------------------------------------|-------------------------------------|--------------------------------------------|----------------------------------------------|------------------------------------------------|----------|--------------------------|
| <i>B. laevigata</i><br><i>de novo</i><br>transcriptome | 238'720<br>(429'166)                | C:93.2% [S:34.9%,D:58.3%]<br>F:3.7%,M:3.1% | 29'286<br>(12.3%)                            | C:62.8% [S:46.5%,D:16.3%]<br>F:2.5%,M:34.7     | 1'599 bp | 3'959<br>(1.7%)          |
| <i>B. laevigata</i><br>genome                          | 54'457<br>(88'133)                  | C:93.9% [S:36.1%,D:57.8%]<br>F:1.9%,M:4.2% | 30'917<br>(56.8%)                            | C:85.7% [S:49.7%,D:36.0%]<br>F:2.8%,M:11.5     | 1'979 bp | 4'172<br>(7.7%)          |
| <i>A. thaliana</i><br>genome                           | 27'655<br>(48'359)                  | C:99.2% [S:60.4%,D:38.8%]<br>F:0.0%,M:0.8% | 21'036<br>(76.1%)                            | C:97.5% [S:63.3%,D:34.2%]<br>F:0.1%,M:2.4%     | 1'611 bp | 7'320<br>(26.5%)         |

773 <sup>#</sup>Genes with expression  $\geq 1$  transcripts per million (TPM) identified among the 2'326 searched Benchmarking Universal Single-Copy Orthologs (BUSCOs);  
 774 abbreviations: C: Completeness, S: single-copy BUSCOs, D: duplicated BUSCOs, F: fragmented BUSCOs, M: missing BUSCOs.

775 <sup>∇</sup>Number of unique differentially-expressed genes (DEGs) with  $\geq 2$ -fold higher or lower expression at FDR <0.001 in a treatment as compared to control.

776

777 **Figures**

778

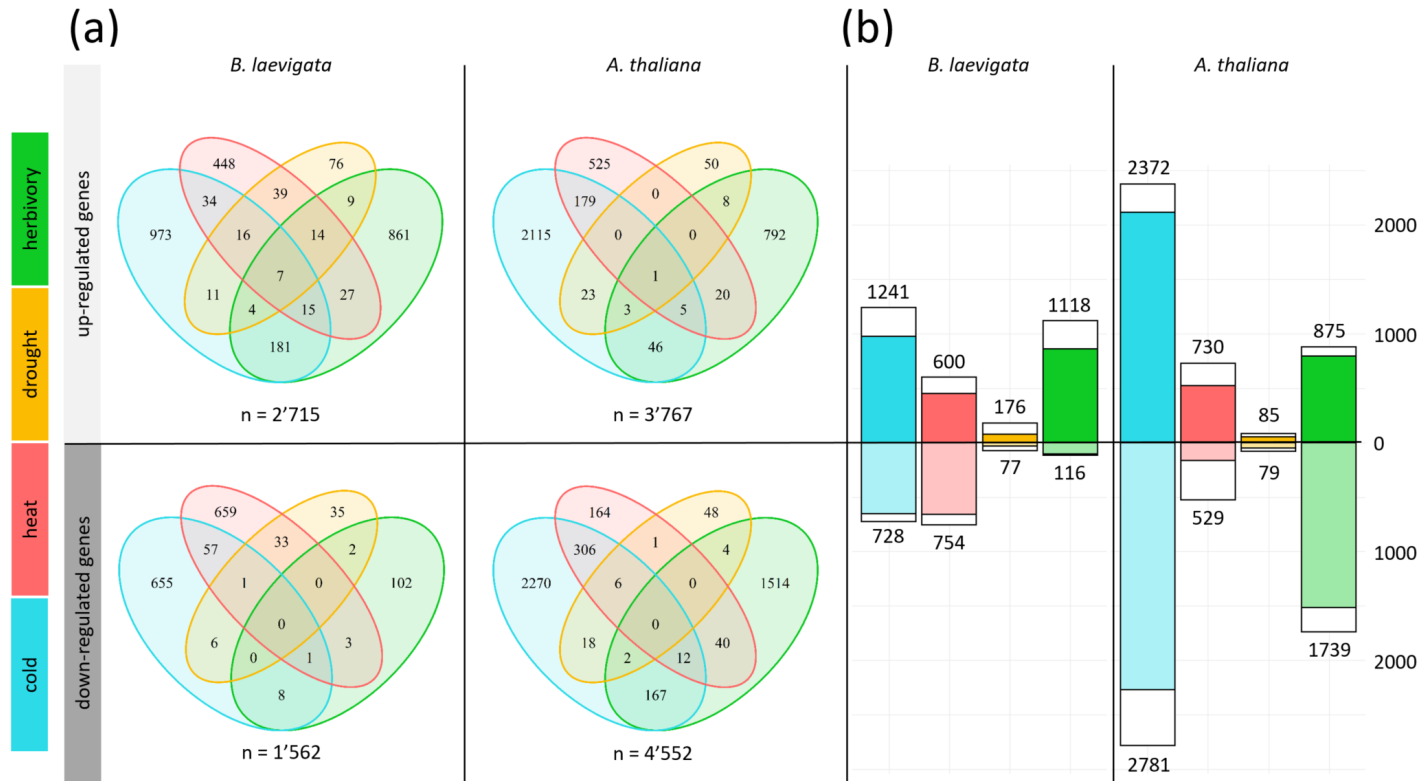

779

780 **Figure 1. Differentially expressed genes (DEGs, with  $\geq 2$ -fold change) in *Biscutella laevigata* and *Arabidopsis thaliana* in response to cold, heat, drought and**  
781 **herbivory treatments. a) Venn diagrams showing the number of up- and down-regulated genes in response to the different environmental treatments. b)**  
782 **Numbers of up- and down-regulated DEGs per treatment, with treatment-specific DEGs presented by the corresponding colour and DEGs in response to multiple**  
783 **treatments shown in white.**



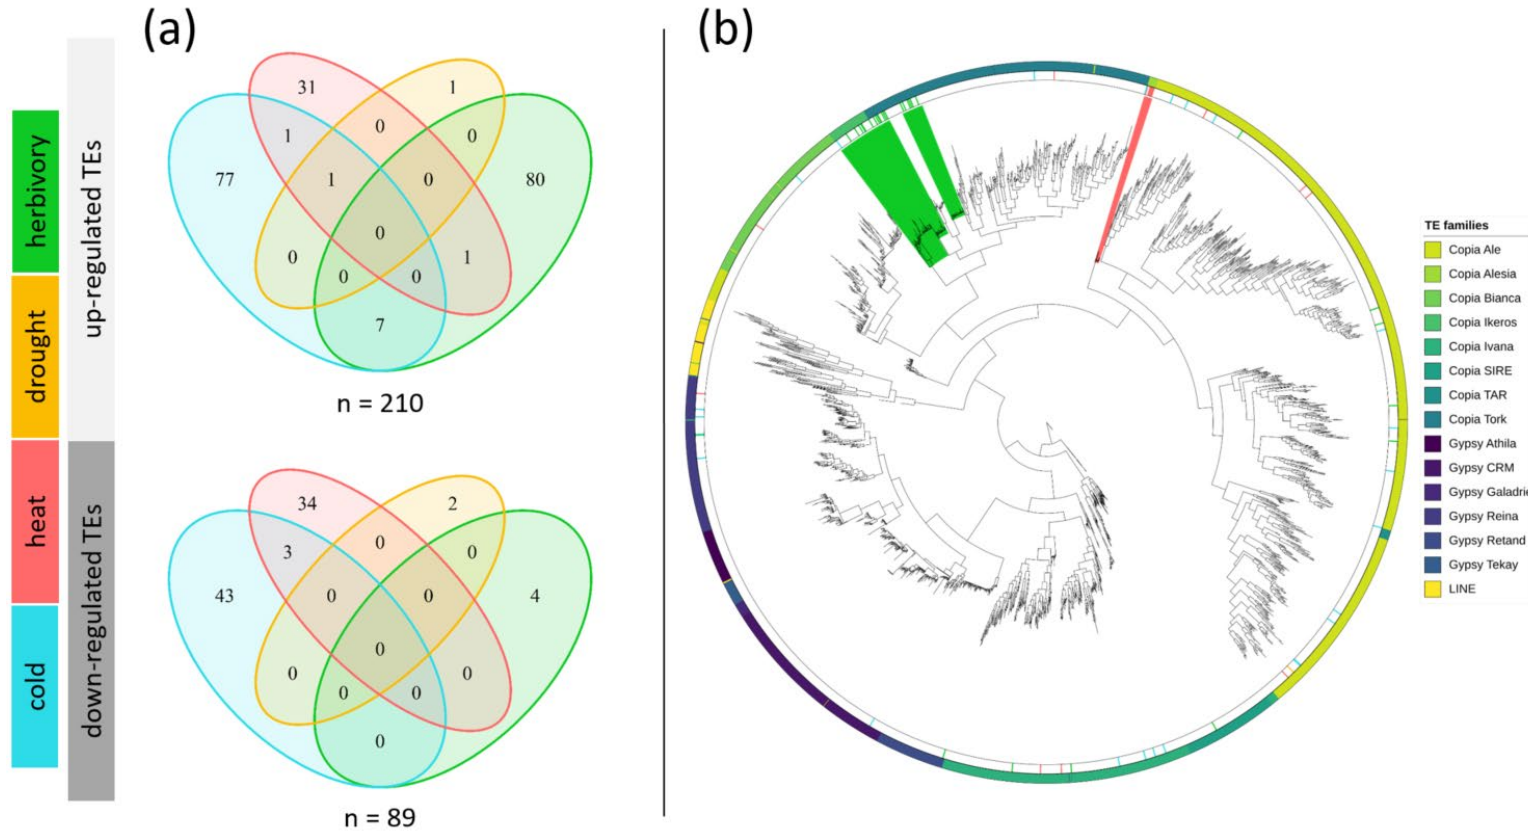

784  
785  
786  
787  
788  
789  
790

**Figure 2. Differentially expressed transposable elements (DE-TEs) in *Biscutella laevigata* in response to cold, heat, herbivory and drought treatments. a)** Venn diagrams showing the number of full-length TE copies showing differential expression in response to environmental treatments in *B. laevigata*. **b)** Phylogenetic tree of TE copies based on their reverse-transcriptase sequences and delineating main TE lineages of long terminal repeat retrotransposons Copia and Gypsy, and long interspersed nuclear element (LINE) according to the legend on the right. Up-regulated DE-TEs in response to environmental treatments are mapped on the inner annotation circle, with clades of consistently up-regulated DE-TEs coloured in green for herbivory and red for heat.

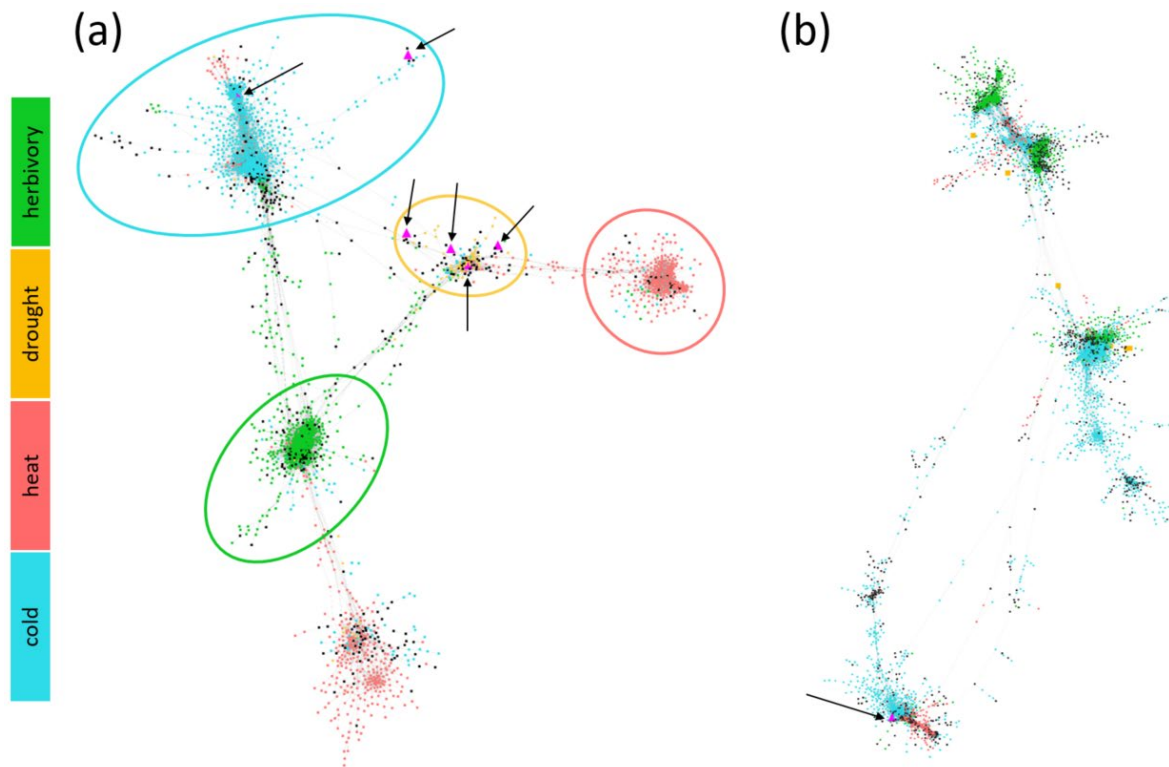

791

792 **Figure 3. Co-expression network based on the transcriptional responses to cold, heat, drought and**  
793 **herbivory treatments (i.e. DEG-networks) in (a) *Biscutella laevigata* and (b) *Arabidopsis thaliana*.**

794 Differentially expressed genes (DEGs) that are strongly co-expressed across environmental treatments  
795 cluster according to the correlation of their expression profiles. Treatment-specific DEGs are coloured  
796 accordingly, whereas DEGs shared among treatments are displayed in black. Subnetworks in *B.*  
797 *laevigata* comprise of treatment-specific DEGs, while most down-regulated genes cluster in the non-  
798 circled subnetwork at the bottom. Magenta triangles (highlighted by arrows) mark the locations of  
799 DEGs that are up-regulated in response to all treatments and locate predominantly in the drought-  
800 subnetwork, indicative of drought responsive genes being equally involved in all treatments.

801

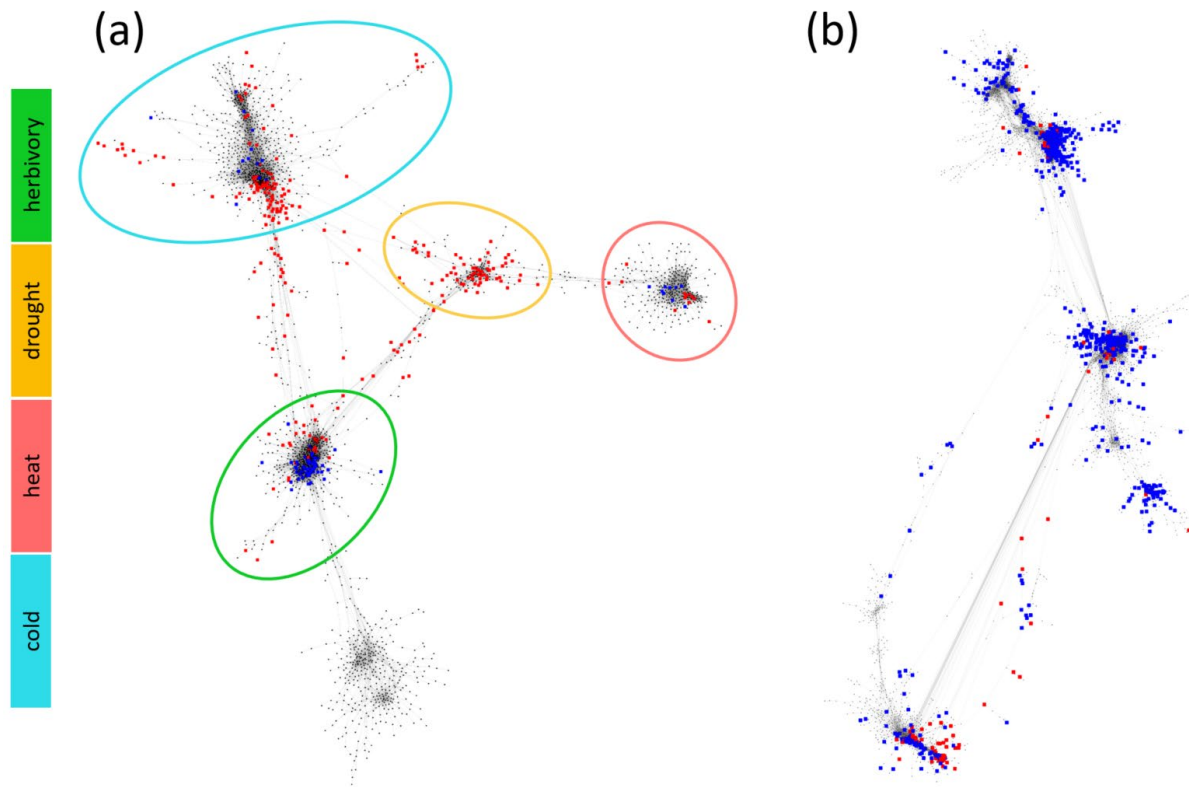

802

803 **Figure 4. Architecture of the *Biscutella laevigata* and *Arabidopsis thaliana* DEG-networks.** Synergistic  
804 DEGs (i.e. up-regulated in at least two treatments) are highlighted in red, whereas trade-off DEGs (i.e.  
805 up-regulated in one treatment and down-regulated in another) are highlighted in blue, showing the  
806 contrasted network architecture of the transcriptional responses to environmental treatments in *B.*  
807 *laevigata* and *A. thaliana*. **a)** The *B. laevigata* DEG-network showing 357 synergistic DEGs at the  
808 intersection of treatment-specific clusters and 105 trade-off DEGs locating within the cold, heat and  
809 herbivory but not the drought subnetwork. **b)** The *A. thaliana* DEG-network contrastingly presents only  
810 285 synergistic DEGs, but 999 trade-off DEGs located across the entire network, indicative of  
811 considerably less synergistic transcriptional responses to investigated treatments.
